# Supplementary material for: Dysfunctional BLK in common variable immunodeficiency perturbs B-cell proliferation and ability to elicit antigen-specific CD4+ T-cell help
Source: PubMed Central journal article supplement (PMC4484417; doi:10.18632/oncotarget.3577), 2015-03-14
Supplement: oncotarget-06-10759-s001.pdf [file oncotarget-06-10759-s001.pdf]

# Dysfunctional BLK in common variable immunodeficiency perturbs B-cell proliferation and ability to elicit antigen-specific CD4<sup>+</sup> T-cell help

## Supplementary Material

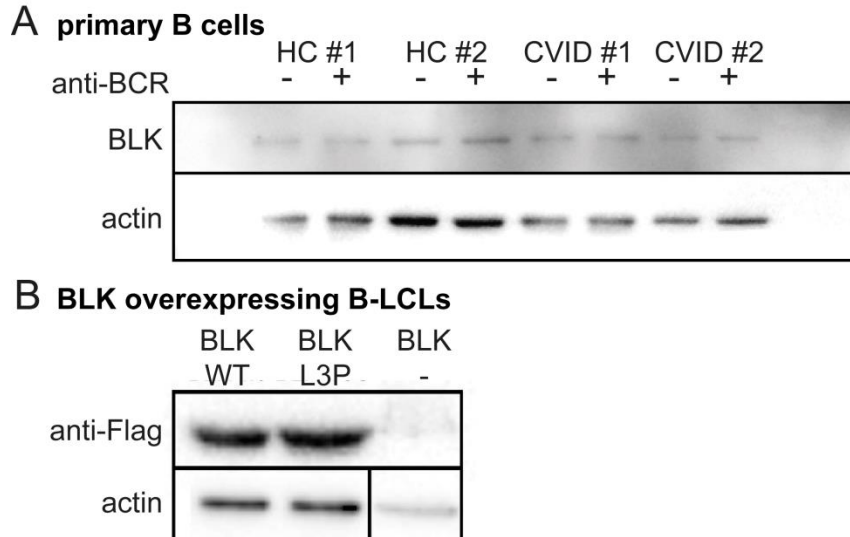

**Figure S1: BLK protein expression.** (A) Expression of endogenous BLK protein in primary CD19<sup>+</sup> B cells of healthy or L3P-BLK CVID patients, or (B) common and L3P variant construct-derived BLK protein, as determined by western blots.

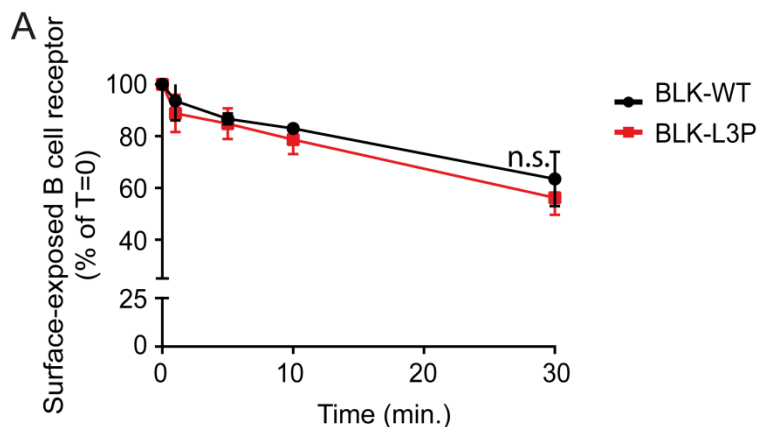

**Figure S2: Ligand-induced B cell receptor internalization.** (A) Surface exposed B cell receptor upon cross-linking with anti-IgG antibodies over time on B-LCLs expressing either L3P- or common BLK variant. \*P-value <0.05, \*\*P-value <0.01, Two-tailed Wilcoxon-signed rank test.
